# Supplementary material for: Physiological Responses of the Submerged Macrophyte Stuckenia pectinata to High Salinity and Irradiance Stress to Assess Eutrophication Management and Climatic Effects: An Integrative Approach
Source: MDPI journal article supplement (doi:10.3390/w13121706), 2021-06-20
Supplement: s1 [file s1]

Article

# Supplementary Materials: Physiological Responses of the Submerged Macrophyte *Stuckenia pectinata* to High Salinity and Irradiance Stress to Assess Eutrophication Management and Climatic Effects: An Integrative Approach

Lamprini Malea <sup>1</sup>, Konstantinia Nakou <sup>1</sup>, Apostolos Papadimitriou <sup>1</sup>, Athanasios Exadactylos <sup>2</sup> and Sotiris Orfanidis <sup>1,\*</sup>

**Citation:** Malea, L.; Nakou, K.; Papadimitriou, A.; Exadactylos, A.; Orfanidis, S. Physiological Responses of the Submerged Macrophyte *Stuckenia pectinata* to High Salinity and Irradiance Stress to Assess Eutrophication Management and Climatic Effects: An Integrative Approach. *Water* **2021**, *13*, x. <https://doi.org/10.3390/xxxxx>

Academic Editor: Eva Papastergiadou

Received: 21 May 2021

Accepted: 17 June 2021

Published: date

**Publisher's Note:** MDPI stays neutral with regard to jurisdictional claims in published maps and institutional affiliations.

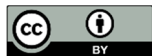

**Copyright:** © 2021 by the authors. Submitted for possible open access publication under the terms and conditions of the Creative Commons Attribution (CC BY) license (<http://creativecommons.org/licenses/by/4.0/>).

<sup>1</sup> Benthic Ecology & Technology Laboratory, Fisheries Research Institute (ELGO-DIMITRA), Nea Peramos, 640 07 Kavala, Greece; lamprini.m379@gmail.com (L.M.); nakou@inale.gr (K.N.); apostolisap@inale.gr (A.P.)

<sup>2</sup> Department of Ichthyology and Aquatic Environment, School of Agricultural Sciences, University of Thessaly, Fytokou str., 384 46 Volos, Greece; thanos046@gmail.com

\* Correspondence: sorfanid@inale.gr

**Table S1.** Two-way repeated measures of variance of JIP-test in *Stuckenia pectinata*.

| Response variable | Effect                   | df | MS      | F         | p-Value | Transformations and significance level | Response variable | df | MS    | F        | p-Value | Transformations and significance level |
|-------------------|--------------------------|----|---------|-----------|---------|----------------------------------------|-------------------|----|-------|----------|---------|----------------------------------------|
| TR0/RC            | Intercept                | 1  | 411.901 | 14944.234 | <0.01   | Non a= 0.01                            | RC/ABS            | 1  | 5.662 | 2672.420 | <0.01   | Non a= 0.01                            |
|                   | Irradiance               | 1  | 0.017   | 0.624     | 0.439   |                                        |                   | 1  | 0.124 | 58.57    | <0.01   |                                        |
|                   | Salinity                 | 1  | 0.081   | 2.948     | 0.101   |                                        |                   | 1  | 0.000 | 0.177    | 0.678   |                                        |
|                   | Irradiance*Salinity      | 1  | 0.029   | 1.036     | 0.321   |                                        |                   | 1  | 0.002 | 1.011    | 0.327   |                                        |
|                   | Error                    | 20 | 0.028   |           |         |                                        |                   | 20 | 0.002 |          |         |                                        |
|                   | Time                     | 2  | 0.013   | 1.501     | 0.235   |                                        |                   | 2  | 0.001 | 1.571    | 0.220   |                                        |
|                   | Time*Irradiance          | 2  | 0.002   | 0.221     | 0.802   |                                        |                   | 2  | 0.002 | 3.430    | 0.042   |                                        |
|                   | Time*Salinity            | 2  | 0.010   | 1.089     | 0.346   |                                        |                   | 2  | 0.003 | 4.948    | 0.012   |                                        |
|                   | Time*Irradiance*Salinity | 2  | 0.005   | 0.587     | 0.561   |                                        |                   | 2  | 0.002 | 4.347    | 0.020   |                                        |
|                   | Error                    | 40 | 0.009   |           |         |                                        |                   | 40 | 0.001 |          |         |                                        |

| Model           | Variable                 | df | ABS/RC   |       |         | Non a=0.01 | Model               | Variable                 | df | DI <sub>0</sub> /RC |          |         | Non a=0.01 |
|-----------------|--------------------------|----|----------|-------|---------|------------|---------------------|--------------------------|----|---------------------|----------|---------|------------|
|                 |                          |    | Estimate | SE    | p-value |            |                     |                          |    | Estimate            | SE       | p-value |            |
| ABS/RC          | Intercept                | 1  | 945.161  | 903.3 | <0.01   | Non a=0.01 | DI <sub>0</sub> /RC | Intercept                | 1  | 132.121             | 134.6    | <0.01   | Non a=0.01 |
|                 | Irradiance               | 1  | 30.001   | 28.67 | <0.01   |            |                     | Irradiance               | 1  | 26.614              | 27.12    | <0.01   |            |
|                 | Salinity                 | 1  | 0.086    | 0.082 | 0.777   |            |                     | Salinity                 | 1  | 0.013               | 0.013    | 0.911   |            |
|                 | Irradiance*Salinity      | 1  | 0.861    | 0.823 | 0.375   |            |                     | Irradiance*Salinity      | 1  | 0.089               | 0.091    | 0.767   |            |
|                 | Error                    | 20 | 1.046    |       |         |            |                     | Error                    | 20 | 0.981               |          |         |            |
|                 | Time                     | 2  | 0.259    | 1.474 | 0.241   |            |                     | Time                     | 2  | 0.853               | 2.116    | 0.134   |            |
|                 | Time*Irradiance          | 2  | 0.384    | 2.186 | 0.126   |            |                     | Time*Irradiance          | 2  | 0.870               | 2.156    | 0.129   |            |
|                 | Time*Salinity            | 2  | 0.869    | 4.947 | 0.012   |            |                     | Time*Salinity            | 2  | 1.820               | 4.513    | 0.017   |            |
|                 | Time*Irradiance*Salinity | 2  | 0.811    | 4.614 | 0.016   |            |                     | Time*Irradiance*Salinity | 2  | 1.674               | 4.150    | 0.023   |            |
|                 | Error                    | 40 | 0.176    |       |         |            |                     | Error                    | 40 | 0.403               |          |         |            |
| φ <sub>P0</sub> | Intercept                | 1  | 32.194   | 3613  | <0.01   | Non a=0.01 | φ <sub>E0</sub>     | Intercept                | 1  | 2.569               | 1095.213 | <0.01   | Non a=0.01 |
|                 | Irradiance               | 1  | 0.622    | 69.86 | <0.01   |            |                     | Irradiance               | 1  | 0.407               | 173.7    | <0.01   |            |
|                 | Salinity                 | 1  | 0.002    | 0.234 | 0.634   |            |                     | Salinity                 | 1  | 0.002               | 0.665    | 0.424   |            |
|                 | Irradiance*Salinity      | 1  | 0.003    | 0.294 | 0.594   |            |                     | Irradiance*Salinity      | 1  | 0.000               | 0.036    | 0.851   |            |
|                 | Error                    | 20 | 0.009    |       |         |            |                     | Error                    | 20 | 0.002               |          |         |            |
|                 | Time                     | 2  | 0.009    | 3.517 | 0.039   |            |                     | Time                     | 2  | 0.013               | 14.48    | <0.01   |            |
|                 | Time*Irradiance          | 2  | 0.008    | 3.044 | 0.059   |            |                     | Time*Irradiance          | 2  | 0.004               | 4.036    | 0.025   |            |
|                 | Time*Salinity            | 2  | 0.019    | 7.081 | <0.01   |            |                     | Time*Salinity            | 2  | 0.002               | 1.914    | 0.161   |            |

|                |                                 |    |       |         |       |             |             |    |         |         |       |             |
|----------------|---------------------------------|----|-------|---------|-------|-------------|-------------|----|---------|---------|-------|-------------|
| $\varphi_{R0}$ | Time*Ir-radiance*Salinity Error | 2  | 0.014 | 5.266   | <0.01 | Non a= 0.01 | $\psi_{E0}$ | 2  | 0.004   | 4.104   | 0.024 | Non a= 0.01 |
|                | Intercept                       | 40 | 0.003 |         |       |             |             | 40 | 0.001   |         |       |             |
|                | Intercept                       | 1  | 0.162 | 543.2   | <0.01 |             |             | 1  | 5.162   | 1644.27 | <0.01 |             |
|                | Irradiance                      | 1  | 0.007 | 24.56   | <0.01 |             |             | 1  | 0.443   | 141.032 | <0.01 |             |
|                | Salinity                        | 1  | 0.000 | 0.106   | 0.748 |             |             | 1  | 0.001   | 0.381   | 0.544 |             |
|                | Irradiance*Salinity             | 1  | 0.000 | 0.000   | 0.988 |             |             | 1  | 0.000   | 0.000   | 0.984 |             |
|                | Error                           | 20 | 0.000 |         |       |             |             | 20 | 0.003   |         |       |             |
|                | Time                            | 2  | 0.001 | 6.252   | <0.01 |             |             | 2  | 0.024   | 14.37   | <0.01 |             |
|                | Time*Ir-radiance                | 2  | 0.001 | 5.570   | <0.01 |             |             | 2  | 0.006   | 3.688   | 0.034 |             |
|                | Time*Salinity                   | 2  | 0.000 | 0.518   | 0.599 |             |             | 2  | 0.002   | 1.182   | 0.317 |             |
|                | Time*Ir-radiance*Salinity       | 2  | 0.000 | 3.093   | 0.056 |             |             | 2  | 0.005   | 3.260   | 0.049 |             |
|                | Error                           | 40 | 0.000 |         |       |             |             | 40 | 0.002   |         |       |             |
|                | Intercept                       | 1  | 5.788 | 580.425 | <0.01 |             |             | 1  | 167.167 | 2383.26 | <0.01 |             |
|                | Irradiance                      | 1  | 0.334 | 33.54   | <0.01 |             |             | 1  | 1.565   | 22.306  | <0.01 |             |
| $\delta_{R0}$  | Salinity                        | 1  | 0.004 | 0.447   | 0.511 | Non a= 0.01 | $M_0'/M_0$  | 1  | 0.000   | 0.001   | 0.971 | Non a= 0.01 |
|                | Irradiance*Salinity             | 1  | 0.004 | 0.405   | 0.532 |             |             | 1  | 0.022   | 0.320   | 0.578 |             |
|                | Error                           | 20 | 0.010 |         |       |             |             | 20 | 0.070   |         |       |             |
|                | Time                            | 2  | 0.004 | 1.070   | 0.353 |             |             | 2  | 0.057   | 4.283   | 0.021 |             |
|                |                                 |    |       |         |       |             |             |    |         |         |       |             |
|                |                                 |    |       |         |       |             |             |    |         |         |       |             |

|                           |    |       |       |       |  |    |       |       |       |
|---------------------------|----|-------|-------|-------|--|----|-------|-------|-------|
| Time*Ir-radiance          | 2  | 0.002 | 0.588 | 0.560 |  | 2  | 0.028 | 2.066 | 0.140 |
| Time*Salinity             | 2  | 0.018 | 4.514 | 0.017 |  | 2  | 0.028 | 2.127 | 0.132 |
| Time*Ir-radiance*Salinity | 2  | 0.005 | 1.240 | 0.300 |  | 2  | 0.001 | 0.069 | 0.934 |
| Error                     | 40 | 0.004 |       |       |  | 40 | 0.013 |       |       |

**Table S2.** Duncan's post hoc test for RC/ABS in *Stuckenia pectinata*.

|    | Condi-<br>tions | TIME        | 1     | 2     | 3     | 4     | 5     | 6     | 7     | 8     | 9     | 10    | 11    | 12    |
|----|-----------------|-------------|-------|-------|-------|-------|-------|-------|-------|-------|-------|-------|-------|-------|
| 1  | C1              | RC/ABS<br>1 |       | 0.856 | 0.439 | 0.608 | 0.503 | 0.500 | 0.019 | 0.000 | 0.002 | 0.000 | 0.000 | 0.001 |
| 2  | C1              | RC/ABS<br>5 | 0.856 |       | 0.370 | 0.674 | 0.565 | 0.564 | 0.017 | 0.000 | 0.001 | 0.000 | 0.000 | 0.001 |
| 3  | C1              | RC/ABS<br>8 | 0.439 | 0.370 |       | 0.326 | 0.258 | 0.258 | 0.051 | 0.000 | 0.006 | 0.000 | 0.001 | 0.005 |
| 4  | C2              | RC/ABS<br>1 | 0.608 | 0.674 | 0.326 |       | 0.781 | 0.770 | 0.007 | 0.000 | 0.000 | 0.000 | 0.000 | 0.000 |
| 5  | C2              | RC/ABS<br>5 | 0.503 | 0.565 | 0.258 | 0.781 |       | 0.973 | 0.005 | 0.000 | 0.000 | 0.000 | 0.000 | 0.000 |
| 6  | C2              | RC/ABS<br>8 | 0.500 | 0.564 | 0.258 | 0.770 | 0.973 |       | 0.005 | 0.000 | 0.000 | 0.000 | 0.000 | 0.000 |
| 7  | C3              | RC/ABS<br>1 | 0.019 | 0.017 | 0.051 | 0.007 | 0.005 | 0.005 |       | 0.000 | 0.146 | 0.028 | 0.133 | 0.279 |
| 8  | C3              | RC/ABS<br>5 | 0.000 | 0.000 | 0.000 | 0.000 | 0.000 | 0.000 | 0.000 |       | 0.005 | 0.434 | 0.131 | 0.056 |
| 9  | C3              | RC/ABS<br>8 | 0.002 | 0.001 | 0.006 | 0.000 | 0.000 | 0.000 | 0.146 | 0.005 |       | 0.184 | 0.550 | 0.896 |
| 10 | C4              | RC/ABS<br>1 | 0.000 | 0.000 | 0.000 | 0.000 | 0.000 | 0.000 | 0.028 | 0.434 | 0.184 |       | 0.235 | 0.073 |

|    |    |             |       |       |       |       |       |       |       |       |       |       |       |
|----|----|-------------|-------|-------|-------|-------|-------|-------|-------|-------|-------|-------|-------|
| 11 | C4 | RC/ABS<br>5 | 0.000 | 0.000 | 0.001 | 0.000 | 0.000 | 0.000 | 0.133 | 0.131 | 0.550 | 0.235 | 0.468 |
| 12 | C4 | RC/ABS<br>8 | 0.001 | 0.001 | 0.005 | 0.000 | 0.000 | 0.000 | 0.279 | 0.056 | 0.896 | 0.073 | 0.468 |

Table S3. Duncan's post hoc test for ABS/RC in *Stuckenia pectinata*.

|    | Condi-<br>tions | TIME        | 1     | 2     | 3     | 4     | 5     | 6     | 7     | 8     | 9     | 10    | 11    | 12    |
|----|-----------------|-------------|-------|-------|-------|-------|-------|-------|-------|-------|-------|-------|-------|-------|
| 1  | C1              | ABS/RC<br>1 |       | 0.381 | 0.591 | 0.797 | 0.430 | 0.421 | 0.173 | 0.001 | 0.065 | 0.001 | 0.018 | 0.022 |
| 2  | C1              | ABS/RC<br>5 | 0.381 |       | 0.692 | 0.751 | 0.765 | 0.757 | 0.082 | 0.000 | 0.026 | 0.000 | 0.006 | 0.007 |
| 3  | C1              | ABS/RC<br>8 | 0.591 | 0.692 |       | 0.924 | 0.611 | 0.605 | 0.119 | 0.001 | 0.040 | 0.000 | 0.010 | 0.012 |
| 4  | C2              | ABS/RC<br>1 | 0.797 | 0.751 | 0.924 |       | 0.349 | 0.337 | 0.127 | 0.001 | 0.044 | 0.000 | 0.011 | 0.014 |
| 5  | C2              | ABS/RC<br>5 | 0.430 | 0.765 | 0.611 | 0.349 |       | 0.960 | 0.049 | 0.000 | 0.014 | 0.000 | 0.003 | 0.004 |
| 6  | C2              | ABS/RC<br>8 | 0.421 | 0.757 | 0.605 | 0.337 | 0.960 |       | 0.049 | 0.000 | 0.014 | 0.000 | 0.003 | 0.004 |
| 7  | C3              | ABS/RC<br>1 | 0.173 | 0.082 | 0.119 | 0.127 | 0.049 | 0.049 |       | 0.001 | 0.324 | 0.022 | 0.234 | 0.269 |
| 8  | C3              | ABS/RC<br>5 | 0.001 | 0.000 | 0.001 | 0.001 | 0.000 | 0.000 | 0.001 |       | 0.009 | 0.780 | 0.288 | 0.259 |
| 9  | C3              | ABS/RC<br>8 | 0.065 | 0.026 | 0.040 | 0.044 | 0.014 | 0.014 | 0.324 | 0.009 |       | 0.070 | 0.505 | 0.566 |
| 10 | C4              | ABS/RC<br>1 | 0.001 | 0.000 | 0.000 | 0.000 | 0.000 | 0.000 | 0.022 | 0.780 | 0.070 |       | 0.041 | 0.029 |
| 11 | C4              | ABS/RC<br>5 | 0.018 | 0.006 | 0.010 | 0.011 | 0.003 | 0.003 | 0.234 | 0.288 | 0.505 | 0.041 |       | 0.823 |
| 12 | C4              | ABS/RC<br>8 | 0.022 | 0.007 | 0.012 | 0.014 | 0.004 | 0.004 | 0.269 | 0.259 | 0.566 | 0.029 | 0.823 |       |

**Table S4.** Duncan's post hoc test for DI<sub>0</sub>/RC in *Stuckenia pectinata*.

|    | Condi-<br>tions | TIME                  | 1            | 2            | 3            | 4            | 5            | 6            | 7            | 8            | 9            | 10           | 11    | 12    |
|----|-----------------|-----------------------|--------------|--------------|--------------|--------------|--------------|--------------|--------------|--------------|--------------|--------------|-------|-------|
| 1  | C1              | DI <sub>0</sub> /RC 1 |              | 0.935        | 0.889        | 0.998        | 0.973        | 0.956        | 0.280        | <b>0.000</b> | 0.110        | <b>0.001</b> | 0.031 | 0.059 |
| 2  | C1              | DI <sub>0</sub> /RC 5 | 0.935        |              | 0.945        | 0.944        | 0.927        | 0.910        | 0.280        | <b>0.000</b> | 0.110        | <b>0.001</b> | 0.032 | 0.060 |
| 3  | C1              | DI <sub>0</sub> /RC 8 | 0.889        | 0.945        |              | 0.906        | 0.889        | 0.872        | 0.274        | <b>0.000</b> | 0.109        | <b>0.002</b> | 0.033 | 0.061 |
| 4  | C2              | DI <sub>0</sub> /RC 1 | 0.998        | 0.944        | 0.906        |              | 0.968        | 0.948        | 0.269        | <b>0.000</b> | 0.104        | <b>0.001</b> | 0.029 | 0.056 |
| 5  | C2              | DI <sub>0</sub> /RC 5 | 0.973        | 0.927        | 0.889        | 0.968        |              | 0.975        | 0.275        | <b>0.000</b> | 0.108        | <b>0.001</b> | 0.030 | 0.058 |
| 6  | C2              | DI <sub>0</sub> /RC 8 | 0.956        | 0.910        | 0.872        | 0.948        | 0.975        |              | 0.272        | <b>0.000</b> | 0.107        | <b>0.001</b> | 0.030 | 0.057 |
| 7  | C3              | DI <sub>0</sub> /RC 1 | 0.280        | 0.280        | 0.274        | 0.269        | 0.275        | 0.272        |              | <b>0.000</b> | 0.456        | 0.024        | 0.238 | 0.362 |
| 8  | C3              | DI <sub>0</sub> /RC 5 | <b>0.000</b> |              | <b>0.002</b> | 0.309        | 0.035 | 0.019 |
| 9  | C3              | DI <sub>0</sub> /RC 8 | 0.110        | 0.110        | 0.109        | 0.104        | 0.108        | 0.107        | 0.456        | <b>0.002</b> |              | 0.081        | 0.517 | 0.720 |
| 10 | C4              | DI <sub>0</sub> /RC 1 | <b>0.001</b> | <b>0.001</b> | <b>0.002</b> | <b>0.001</b> | <b>0.001</b> | <b>0.001</b> | 0.024        | 0.309        | 0.081        |              | 0.139 | 0.076 |
| 11 | C4              | DI <sub>0</sub> /RC 5 | 0.031        | 0.032        | 0.033        | 0.029        | 0.030        | 0.030        | 0.238        | 0.035        | 0.517        | 0.139        |       | 0.685 |
| 12 | C4              | DI <sub>0</sub> /RC 8 | 0.059        | 0.060        | 0.061        | 0.056        | 0.058        | 0.057        | 0.362        | 0.019        | 0.720        | 0.076        | 0.685 |       |

**Table S5.** Duncan's post hoc test for  $\varphi_{P0}$  in *Stuckenia pectinata*.

|    | Condi-<br>tions | TIME             | 1            | 2            | 3            | 4            | 5            | 6            | 7            | 8            | 9            | 10           | 11           | 12           |
|----|-----------------|------------------|--------------|--------------|--------------|--------------|--------------|--------------|--------------|--------------|--------------|--------------|--------------|--------------|
| 1  | C1              | $\varphi_{P0}$ 1 |              | 0.719        | 0.720        | 0.835        | 0.868        | 0.910        | 0.016        | <b>0.000</b> | <b>0.001</b> | <b>0.000</b> | <b>0.000</b> | <b>0.000</b> |
| 2  | C1              | $\varphi_{P0}$ 5 | 0.719        |              | 0.994        | 0.941        | 0.904        | 0.862        | 0.020        | <b>0.000</b> | <b>0.001</b> | <b>0.000</b> | <b>0.000</b> | <b>0.001</b> |
| 3  | C1              | $\varphi_{P0}$ 8 | 0.720        | 0.994        |              | 0.941        | 0.905        | 0.864        | 0.016        | <b>0.000</b> | <b>0.001</b> | <b>0.000</b> | <b>0.000</b> | <b>0.001</b> |
| 4  | C2              | $\varphi_{P0}$ 1 | 0.835        | 0.941        | 0.941        |              | 0.941        | 0.882        | 0.020        | <b>0.000</b> | <b>0.001</b> | <b>0.000</b> | <b>0.000</b> | <b>0.001</b> |
| 5  | C2              | $\varphi_{P0}$ 5 | 0.868        | 0.904        | 0.905        | 0.941        |              | 0.932        | 0.020        | <b>0.000</b> | <b>0.001</b> | <b>0.000</b> | <b>0.000</b> | <b>0.001</b> |
| 6  | C2              | $\varphi_{P0}$ 8 | 0.910        | 0.862        | 0.864        | 0.882        | 0.932        |              | 0.019        | <b>0.000</b> | <b>0.001</b> | <b>0.000</b> | <b>0.000</b> | <b>0.000</b> |
| 7  | C3              | $\varphi_{P0}$ 1 | 0.016        | 0.020        | 0.016        | 0.020        | 0.020        | 0.019        |              | <b>0.000</b> | 0.137        | <b>0.004</b> | 0.054        | 0.181        |
| 8  | C3              | $\varphi_{P0}$ 5 | <b>0.000</b> |              | <b>0.001</b> | 0.466        | 0.077        | 0.019        |
| 9  | C3              | $\varphi_{P0}$ 8 | <b>0.001</b> | <b>0.001</b> | <b>0.001</b> | <b>0.001</b> | <b>0.001</b> | <b>0.001</b> | 0.137        | <b>0.001</b> |              | 0.050        | 0.346        | 0.765        |
| 10 | C4              | $\varphi_{P0}$ 1 | <b>0.000</b> | <b>0.000</b> | <b>0.000</b> | <b>0.000</b> | <b>0.000</b> | <b>0.000</b> | <b>0.004</b> | 0.466        | 0.050        |              | 0.126        | 0.021        |
| 11 | C4              | $\varphi_{P0}$ 5 | <b>0.000</b> | <b>0.000</b> | <b>0.000</b> | <b>0.000</b> | <b>0.000</b> | <b>0.000</b> | 0.054        | 0.077        | 0.346        | 0.126        |              | 0.349        |
| 12 | C4              | $\varphi_{P0}$ 8 | <b>0.000</b> | <b>0.001</b> | <b>0.001</b> | <b>0.001</b> | <b>0.001</b> | <b>0.000</b> | 0.181        | 0.019        | 0.765        | 0.021        | 0.349        |              |

Table S6. Duncan's post hoc test for  $\phi_{E0}$  in *Stuckenia pectinata*.

|    | Condi-<br>tions | TIME          | 1            | 2            | 3            | 4            | 5            | 6            | 7            | 8            | 9            | 10           | 11           | 12           |
|----|-----------------|---------------|--------------|--------------|--------------|--------------|--------------|--------------|--------------|--------------|--------------|--------------|--------------|--------------|
| 1  | C1              | $\phi_{E0}$ 1 |              | 0.018        | 0.018        | 0.929        | 0.017        | 0.029        | <b>0.000</b> | <b>0.000</b> | <b>0.000</b> | <b>0.000</b> | <b>0.000</b> | <b>0.000</b> |
| 2  | C1              | $\phi_{E0}$ 5 | 0.018        |              | 0.909        | 0.051        | 0.553        | 0.724        | <b>0.000</b> | <b>0.000</b> | <b>0.000</b> | <b>0.000</b> | <b>0.000</b> | <b>0.000</b> |
| 3  | C1              | $\phi_{E0}$ 8 | 0.018        | 0.909        |              | 0.054        | 0.513        | 0.677        | <b>0.000</b> | <b>0.000</b> | <b>0.000</b> | <b>0.000</b> | <b>0.000</b> | <b>0.000</b> |
| 4  | C2              | $\phi_{E0}$ 1 | 0.929        | 0.051        | 0.054        |              | <b>0.003</b> | <b>0.007</b> | <b>0.000</b> | <b>0.000</b> | <b>0.000</b> | <b>0.000</b> | <b>0.000</b> | <b>0.000</b> |
| 5  | C2              | $\phi_{E0}$ 5 | 0.017        | 0.553        | 0.513        | <b>0.003</b> |              | 0.729        | <b>0.000</b> | <b>0.000</b> | <b>0.000</b> | <b>0.000</b> | <b>0.000</b> | <b>0.000</b> |
| 6  | C2              | $\phi_{E0}$ 8 | 0.029        | 0.724        | 0.677        | <b>0.007</b> | 0.729        |              | <b>0.000</b> | <b>0.000</b> | <b>0.000</b> | <b>0.000</b> | <b>0.000</b> | <b>0.000</b> |
| 7  | C3              | $\phi_{E0}$ 1 | <b>0.000</b> | <b>0.000</b> | <b>0.000</b> | <b>0.000</b> | <b>0.000</b> | <b>0.000</b> |              | <b>0.000</b> | 0.180        | 0.026        | 0.025        | 0.154        |
| 8  | C3              | $\phi_{E0}$ 5 | <b>0.000</b> |              | <b>0.003</b> | 0.194        | 0.206        | 0.038        |
| 9  | C3              | $\phi_{E0}$ 8 | <b>0.000</b> | <b>0.000</b> | <b>0.000</b> | <b>0.000</b> | <b>0.000</b> | <b>0.000</b> | 0.180        | <b>0.003</b> |              | 0.200        | 0.198        | 0.668        |
| 10 | C4              | $\phi_{E0}$ 1 | <b>0.000</b> | <b>0.000</b> | <b>0.000</b> | <b>0.000</b> | <b>0.000</b> | <b>0.000</b> | 0.026        | 0.194        | 0.200        |              | 0.958        | 0.253        |
| 11 | C4              | $\phi_{E0}$ 5 | <b>0.000</b> | <b>0.000</b> | <b>0.000</b> | <b>0.000</b> | <b>0.000</b> | <b>0.000</b> | 0.025        | 0.206        | 0.198        | 0.958        |              | 0.246        |
| 12 | C4              | $\phi_{E0}$ 8 | <b>0.000</b> | <b>0.000</b> | <b>0.000</b> | <b>0.000</b> | <b>0.000</b> | <b>0.000</b> | 0.154        | 0.038        | 0.668        | 0.253        | 0.246        |              |

Table S7. Duncan's post hoc test for  $\phi_{R0}$  in *Stuckenia pectinata*.

|    | Condi-<br>tions | TIME          | 1            | 2            | 3            | 4            | 5            | 6            | 7            | 8            | 9            | 10           | 11           | 12           |
|----|-----------------|---------------|--------------|--------------|--------------|--------------|--------------|--------------|--------------|--------------|--------------|--------------|--------------|--------------|
| 1  | C1              | $\phi_{R0}$ 1 |              | 0.907        | 0.172        | 0.292        | 0.329        | 0.109        | 0.104        | <b>0.000</b> | 0.078        | 0.020        | <b>0.002</b> | 0.015        |
| 2  | C1              | $\phi_{R0}$ 5 | 0.907        |              | 0.154        | 0.307        | 0.313        | 0.098        | 0.092        | <b>0.000</b> | 0.068        | 0.017        | <b>0.002</b> | 0.013        |
| 3  | C1              | $\phi_{R0}$ 8 | 0.172        | 0.154        |              | 0.035        | 0.780        | 0.607        | 0.584        | <b>0.003</b> | 0.487        | 0.204        | 0.048        | 0.171        |
| 4  | C2              | $\phi_{R0}$ 1 | 0.292        | 0.307        | 0.035        |              | 0.028        | <b>0.004</b> | 0.010        | <b>0.000</b> | <b>0.007</b> | <b>0.001</b> | <b>0.000</b> | <b>0.001</b> |
| 5  | C2              | $\phi_{R0}$ 5 | 0.329        | 0.313        | 0.780        | 0.028        |              | 0.387        | 0.436        | <b>0.001</b> | 0.355        | 0.135        | 0.028        | 0.112        |
| 6  | C2              | $\phi_{R0}$ 8 | 0.109        | 0.098        | 0.607        | <b>0.004</b> | 0.387        |              | 0.943        | 0.011        | 0.810        | 0.402        | 0.120        | 0.348        |
| 7  | C3              | $\phi_{R0}$ 1 | 0.104        | 0.092        | 0.584        | 0.010        | 0.436        | 0.943        |              | <b>0.004</b> | 0.829        | 0.422        | 0.129        | 0.370        |
| 8  | C3              | $\phi_{R0}$ 5 | <b>0.000</b> | <b>0.000</b> | <b>0.003</b> | <b>0.000</b> | <b>0.001</b> | <b>0.011</b> | <b>0.004</b> |              | <b>0.006</b> | 0.068        | 0.251        | 0.079        |
| 9  | C3              | $\phi_{R0}$ 8 | 0.078        | 0.068        | 0.487        | <b>0.007</b> | 0.355        | 0.810        | 0.829        | <b>0.006</b> |              | 0.502        | 0.166        | 0.449        |
| 10 | C4              | $\phi_{R0}$ 1 | 0.020        | 0.017        | 0.204        | <b>0.001</b> | 0.135        | 0.402        | 0.422        | 0.068        | 0.502        |              | 0.348        | 0.873        |
| 11 | C4              | $\phi_{R0}$ 5 | <b>0.002</b> | <b>0.002</b> | 0.048        | <b>0.000</b> | 0.028        | 0.120        | 0.129        | 0.251        | 0.166        | 0.348        |              | 0.401        |
| 12 | C4              | $\phi_{R0}$ 8 | 0.015        | 0.013        | 0.171        | <b>0.001</b> | 0.112        | 0.348        | 0.370        | 0.079        | 0.449        | 0.873        | 0.401        |              |

Table S8. Duncan's post hoc test for  $\psi_{E0}$  in *Stuckenia pectinata*.

|  | Condi-<br>tions | TIME | 1 | 2 | 3 | 4 | 5 | 6 | 7 | 8 | 9 | 10 | 11 | 12 |
|--|-----------------|------|---|---|---|---|---|---|---|---|---|----|----|----|
|--|-----------------|------|---|---|---|---|---|---|---|---|---|----|----|----|



|    |    |               |              |              |              |              |              |              |              |              |              |              |              |              |
|----|----|---------------|--------------|--------------|--------------|--------------|--------------|--------------|--------------|--------------|--------------|--------------|--------------|--------------|
| 1  | C1 | $\Psi_{E0}$ 1 |              | 0.031        | 0.039        | 0.761        | 0.017        | 0.027        | <b>0.000</b> | <b>0.000</b> | <b>0.000</b> | <b>0.000</b> | <b>0.000</b> | <b>0.000</b> |
| 2  | C1 | $\Psi_{E0}$ 5 | 0.031        |              | 0.837        | 0.034        | 0.536        | 0.687        | <b>0.001</b> | <b>0.000</b> | <b>0.000</b> | <b>0.000</b> | <b>0.000</b> | <b>0.000</b> |
| 3  | C1 | $\Psi_{E0}$ 8 | 0.039        | 0.837        |              | 0.044        | 0.448        | 0.585        | <b>0.001</b> | <b>0.000</b> | <b>0.000</b> | <b>0.000</b> | <b>0.000</b> | <b>0.000</b> |
| 4  | C2 | $\Psi_{E0}$ 1 | 0.761        | 0.034        | 0.044        |              | <b>0.003</b> | <b>0.006</b> | <b>0.000</b> | <b>0.000</b> | <b>0.000</b> | <b>0.000</b> | <b>0.000</b> | <b>0.000</b> |
| 5  | C2 | $\Psi_{E0}$ 5 | 0.017        | 0.536        | 0.448        | <b>0.003</b> |              | 0.769        | <b>0.005</b> | <b>0.000</b> | <b>0.001</b> | <b>0.000</b> | <b>0.000</b> | <b>0.000</b> |
| 6  | C2 | $\Psi_{E0}$ 8 | 0.027        | 0.687        | 0.585        | <b>0.006</b> | 0.769        |              | <b>0.004</b> | <b>0.000</b> | <b>0.000</b> | <b>0.000</b> | <b>0.000</b> | <b>0.000</b> |
| 7  | C3 | $\Psi_{E0}$ 1 | <b>0.000</b> | <b>0.001</b> | <b>0.001</b> | <b>0.000</b> | <b>0.005</b> | <b>0.004</b> |              | <b>0.000</b> | 0.383        | 0.085        | 0.041        | 0.217        |
| 8  | C3 | $\Psi_{E0}$ 5 | <b>0.000</b> |              | <b>0.002</b> | 0.064        | 0.119        | 0.020        |
| 9  | C3 | $\Psi_{E0}$ 8 | <b>0.000</b> | <b>0.000</b> | <b>0.000</b> | <b>0.000</b> | <b>0.001</b> | <b>0.000</b> | 0.383        | <b>0.002</b> |              | 0.288        | 0.164        | 0.581        |
| 10 | C4 | $\Psi_{E0}$ 1 | <b>0.000</b> | <b>0.000</b> | <b>0.000</b> | <b>0.000</b> | <b>0.000</b> | <b>0.000</b> | 0.085        | 0.064        | 0.288        |              | 0.643        | 0.506        |
| 11 | C4 | $\Psi_{E0}$ 5 | <b>0.000</b> | <b>0.000</b> | <b>0.000</b> | <b>0.000</b> | <b>0.000</b> | <b>0.000</b> | 0.041        | 0.119        | 0.164        | 0.643        |              | 0.291        |
| 12 | C4 | $\Psi_{E0}$ 8 | <b>0.000</b> | <b>0.000</b> | <b>0.000</b> | <b>0.000</b> | <b>0.000</b> | <b>0.000</b> | 0.217        | 0.020        | 0.581        | 0.506        | 0.291        |              |

Table S9. Duncan's post hoc test for  $\delta_{R0}$  in *Stuckenia pectinata*.

|    | Condi-<br>tions | TIME            | 1            | 2            | 3            | 4            | 5            | 6            | 7     | 8            | 9            | 10           | 11           | 12           |
|----|-----------------|-----------------|--------------|--------------|--------------|--------------|--------------|--------------|-------|--------------|--------------|--------------|--------------|--------------|
| 1  | C1              | $\delta_{R0}$ 1 |              | 0.302        | 0.914        | 0.531        | 0.632        | 0.813        | 0.048 | <b>0.003</b> | <b>0.007</b> | <b>0.000</b> | 0.010        | <b>0.009</b> |
| 2  | C1              | $\delta_{R0}$ 5 | 0.302        |              | 0.270        | 0.792        | 0.671        | 0.305        | 0.194 | 0.023        | 0.047        | <b>0.000</b> | 0.061        | 0.058        |
| 3  | C1              | $\delta_{R0}$ 8 | 0.914        | 0.270        |              | 0.495        | 0.596        | 0.869        | 0.043 | <b>0.002</b> | <b>0.006</b> | <b>0.000</b> | <b>0.009</b> | <b>0.008</b> |
| 4  | C2              | $\delta_{R0}$ 1 | 0.531        | 0.792        | 0.495        |              | 0.815        | 0.318        | 0.142 | 0.013        | 0.029        | <b>0.000</b> | 0.040        | 0.037        |
| 5  | C2              | $\delta_{R0}$ 5 | 0.632        | 0.671        | 0.596        | 0.815        |              | 0.418        | 0.111 | <b>0.009</b> | 0.020        | <b>0.000</b> | 0.030        | 0.026        |
| 6  | C2              | $\delta_{R0}$ 8 | 0.813        | 0.305        | 0.869        | 0.318        | 0.418        |              | 0.032 | <b>0.002</b> | <b>0.004</b> | <b>0.000</b> | <b>0.006</b> | <b>0.005</b> |
| 7  | C3              | $\delta_{R0}$ 1 | 0.048        | 0.194        | 0.043        | 0.142        | 0.111        | 0.032        |       | 0.160        | 0.297        | 0.015        | 0.485        | 0.458        |
| 8  | C3              | $\delta_{R0}$ 5 | <b>0.003</b> | 0.023        | <b>0.002</b> | 0.013        | <b>0.009</b> | <b>0.002</b> | 0.160 |              | 0.660        | 0.136        | 0.588        | 0.635        |
| 9  | C3              | $\delta_{R0}$ 8 | <b>0.007</b> | 0.047        | <b>0.006</b> | 0.029        | 0.020        | <b>0.004</b> | 0.297 | 0.660        |              | 0.082        | 0.820        | 0.882        |
| 10 | C4              | $\delta_{R0}$ 1 | <b>0.000</b> | <b>0.000</b> | <b>0.000</b> | <b>0.000</b> | <b>0.000</b> | <b>0.000</b> | 0.015 | 0.136        | 0.082        |              | 0.023        | 0.026        |
| 11 | C4              | $\delta_{R0}$ 5 | 0.010        | 0.061        | <b>0.009</b> | 0.040        | 0.030        | <b>0.006</b> | 0.485 | 0.588        | 0.820        | 0.023        |              | 0.908        |
| 12 | C4              | $\delta_{R0}$ 8 | <b>0.009</b> | 0.058        | <b>0.008</b> | 0.037        | 0.026        | <b>0.005</b> | 0.458 | 0.635        | 0.882        | 0.026        | 0.908        |              |

**Table S10.** Duncan's post hoc test for  $M_0/M_0$  in *Stuckenia pectinata*.

|    | Condi-<br>tions | TIME        | 1            | 2            | 3            | 4            | 5            | 6            | 7            | 8            | 9            | 10    | 11           | 12           |
|----|-----------------|-------------|--------------|--------------|--------------|--------------|--------------|--------------|--------------|--------------|--------------|-------|--------------|--------------|
| 1  | C1              | $M_0/M_0$ 1 |              | 0.346        | 0.156        | 0.728        | 0.878        | 0.912        | 0.118        | <b>0.001</b> | <b>0.005</b> | 0.014 | <b>0.002</b> | <b>0.005</b> |
| 2  | C1              | $M_0/M_0$ 5 | 0.346        |              | 0.568        | 0.763        | 0.624        | 0.603        | 0.285        | <b>0.006</b> | 0.019        | 0.047 | <b>0.007</b> | 0.019        |
| 3  | C1              | $M_0/M_0$ 8 | 0.156        | 0.568        |              | 0.531        | 0.422        | 0.405        | 0.440        | 0.014        | 0.039        | 0.085 | 0.016        | 0.038        |
| 4  | C2              | $M_0/M_0$ 1 | 0.728        | 0.763        | 0.531        |              | 0.732        | 0.690        | 0.193        | <b>0.003</b> | 0.010        | 0.027 | <b>0.004</b> | 0.010        |
| 5  | C2              | $M_0/M_0$ 5 | 0.878        | 0.624        | 0.422        | 0.732        |              | 0.934        | 0.143        | <b>0.002</b> | <b>0.006</b> | 0.018 | <b>0.002</b> | <b>0.006</b> |
| 6  | C2              | $M_0/M_0$ 8 | 0.912        | 0.603        | 0.405        | 0.690        | 0.934        |              | 0.137        | <b>0.002</b> | <b>0.006</b> | 0.017 | <b>0.002</b> | <b>0.006</b> |
| 7  | C3              | $M_0/M_0$ 1 | 0.118        | 0.285        | 0.440        | 0.193        | 0.143        | 0.137        |              | <b>0.005</b> | 0.027        | 0.286 | 0.075        | 0.150        |
| 8  | C3              | $M_0/M_0$ 5 | <b>0.001</b> | <b>0.006</b> | 0.014        | <b>0.003</b> | <b>0.002</b> | <b>0.002</b> | <b>0.005</b> |              | 0.439        | 0.360 | 0.928        | 0.607        |
| 9  | C3              | $M_0/M_0$ 8 | <b>0.005</b> | 0.019        | 0.039        | 0.010        | <b>0.006</b> | <b>0.006</b> | 0.027        | 0.439        |              | 0.635 | 0.659        | 0.970        |
| 10 | C4              | $M_0/M_0$ 1 | 0.014        | 0.047        | 0.085        | 0.027        | 0.018        | 0.017        | 0.286        | 0.360        | 0.635        |       | 0.184        | 0.468        |
| 11 | C4              | $M_0/M_0$ 5 | <b>0.002</b> | <b>0.007</b> | <b>0.016</b> | <b>0.004</b> | <b>0.002</b> | <b>0.002</b> | 0.075        | 0.928        | 0.659        | 0.184 |              | 0.485        |
| 12 | C4              | $M_0/M_0$ 8 | <b>0.005</b> | <b>0.019</b> | <b>0.038</b> | <b>0.010</b> | <b>0.006</b> | <b>0.006</b> | 0.150        | 0.607        | 0.970        | 0.468 | 0.485        |              |

**Table S11.** Two-way measures of variance of chlorophyll content and ratio in *Stuckenia pectinata*.

| Response variable                | Effect              | df | MS      | F        | p-Value         | Transformations<br>and significance<br>level |
|----------------------------------|---------------------|----|---------|----------|-----------------|----------------------------------------------|
| <b>Chl <math>\alpha</math></b>   | Intercept           | 1  | 199.232 | 173.648  | 0.000           | Non. a= 0.01                                 |
|                                  | Irradiance          | 1  | 6.622   | 5.772    | 0.026           |                                              |
|                                  | Salinity            | 1  | 1.344   | 1.172    | 0.292           |                                              |
|                                  | Irradiance*Salinity | 1  | 23.114  | 20.146   | <b>&lt;0.01</b> |                                              |
|                                  | Error               | 20 | 1.147   |          |                 |                                              |
| <b>Chl <math>b</math></b>        | Intercept           | 1  | 52.670  | 136.317  | 0.000           | Non. a=0.01                                  |
|                                  | Irradiance          | 1  | 2.645   | 6.847    | 0.017           |                                              |
|                                  | Salinity            | 1  | 0.487   | 1.262    | 0.275           |                                              |
|                                  | Irradiance*Salinity | 1  | 6.343   | 16.416   | <b>&lt;0.01</b> |                                              |
|                                  | Error               | 20 | 0.386   |          |                 |                                              |
| <b>Chl <math>\alpha/b</math></b> | Intercept           | 1  | 95.260  | 1404.985 | <0.01           | Non. a=0.01                                  |
|                                  | Irradiance          | 1  | 0.274   | 4.044    | 0.058           |                                              |
|                                  | Salinity            | 1  | 0.000   | 0.006    | 0.938           |                                              |
|                                  | Irradiance*Salinity | 1  | 0.018   | 0.268    | 0.611           |                                              |
|                                  | Error               | 20 | 0.068   |          |                 |                                              |

**Table S12.** Duncan's post hoc test for Chl  $\alpha$  in *Stuckenia pectinata*.

|   | Conditions | 1            | 2     | 3            | 4            |
|---|------------|--------------|-------|--------------|--------------|
| 1 | C1         |              | 0.032 | <b>0.000</b> | 0.362        |
| 2 | C2         | 0.032        |       | 0.023        | 0.156        |
| 3 | C3         | <b>0.000</b> | 0.023 |              | <b>0.001</b> |
| 4 | C4         | 0.362        | 0.156 | <b>0.001</b> |              |

Table S13. Duncan's post hoc test for Chl *b* in *Stuckenia pectinata*.

|   | Conditions | 1            | 2     | 3            | 4            |
|---|------------|--------------|-------|--------------|--------------|
| 1 | C1         |              | 0.063 | <b>0.000</b> | 0.304        |
| 2 | C2         | 0.063        |       | 0.016        | 0.322        |
| 3 | C3         | <b>0.000</b> | 0.016 |              | <b>0.002</b> |
| 4 | C4         | 0.304        | 0.322 | <b>0.002</b> |              |

Table S14. Two-way measures of variance of RGR in *Stuckenia pectinata*.

| Response variable | Effect              | df | MS    | F       | p-Value | Transformations and significance level |
|-------------------|---------------------|----|-------|---------|---------|----------------------------------------|
| <b>RGR</b>        | Intercept           | 1  | 0.037 | 342.617 | <0.001  | Non. a= 0.01                           |
|                   | Irradiance          | 1  | 0.000 | 2.096   | 0.163   |                                        |
|                   | Salinity            | 1  | 0.000 | 1.196   | 0.287   |                                        |
|                   | Irradiance*Salinity | 1  | 0.000 | 0.701   | 0.412   |                                        |
|                   | Error               | 20 | 0.000 |         |         |                                        |
